# Supplementary material for: Lipid Droplet Motility Increases Following Viral Immune Stimulation
Source: MDPI journal article supplement (doi:10.3390/ijms22094418), 2021-04-23
Supplement: s1 [file s1]

## Supplementary Material

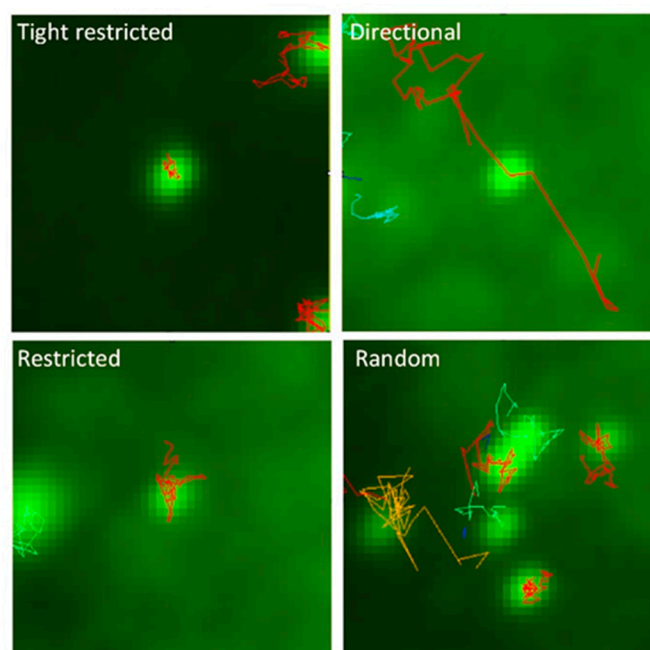

**Figure S1.** Lipid droplet diffusion types. There were 4 different diffusion types of LDs observed in the study; tight restricted, restricted, directional and random.

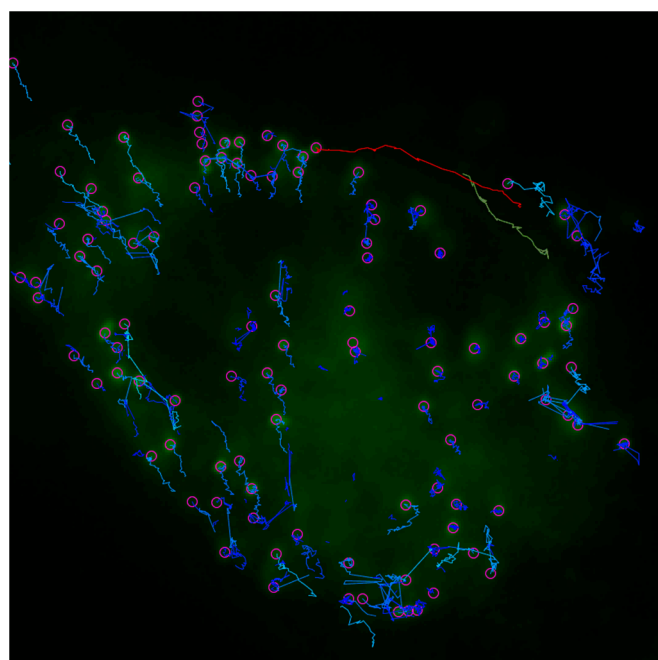

**Video S1.** Lipid droplet tracks 4 h post-dsRNA stimulation. Images were captured every 5 s for a total of 49 frames. The TrackMate software on FIJI was used to track individual LDs within cells.
